# Supplementary material for: High-resolution TADs reveal DNA sequences underlying genome organization in flies
Source: PubMed Central journal article supplement (PMC5768762; doi:10.1038/s41467-017-02525-w), 2018-01-15
Supplement: 41467_2017_2525_MOESM1_ESM.pdf [file 41467_2017_2525_MOESM1_ESM.pdf]

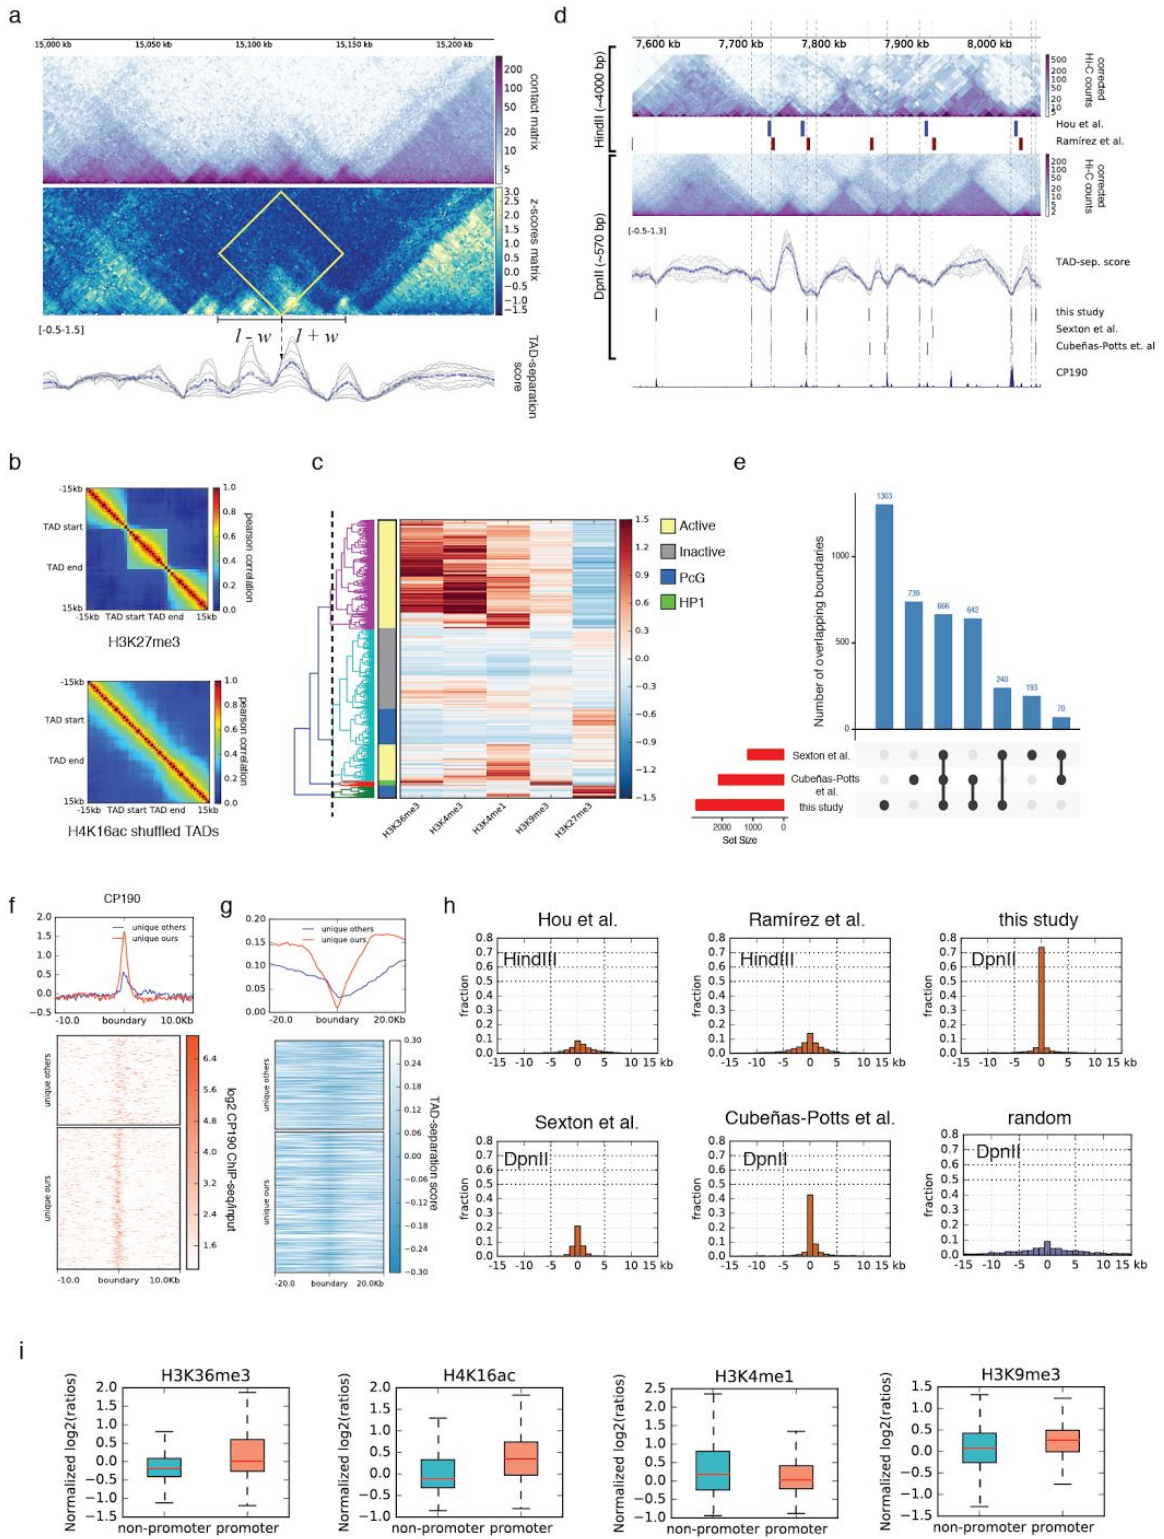

**Supplementary Figure 1. Detection of TAD boundaries and assessment of their quality. a.** Method to identify boundaries (see ‘methods’ for details). Top, Hi-C contact matrix counts. Middle, z-score transformed matrix. Last: TAD-separation score at different window lengths (gray lines) and mean score (blue line). The TAD-separation score at bin ( $l$ ) corresponds to the mean values of the z-scores inside the ‘diamond’, which correspond to the contacts between a region of width  $w$  on left and on right. **b.** Similar to Fig. 1c, Pearson correlations of histone marks within and outside TADs (+15kb flanking regions) and for a random placement of boundaries. **c.** Hierarchical clustering of TADs based on modENCODE histone marks for Kc167 cells. Manual annotations for active, inactive, PcG and HP1 are based on the clustering results (see methods). **d.** Example genomic location comparing published boundaries with the ones generated in this study. Top, HindIII based Hi-C contact matrix counts for S2 cell line <sup>1</sup> and boundaries reported by Hou et al.<sup>2</sup> (Kc167) and Ramirez et al.<sup>1</sup> (S2). Bottom, DpnII based Hi-C contact matrix and the boundaries from this study, Sexton et al.<sup>3</sup> and Cubeñas-Potts et al. <sup>4</sup>. Below the Hi-C heatmap is the TAD-separation score as in Fig. 1a. The last track shows CP190 ChIP-seq signal <sup>5</sup>. The vertical lines correspond to the boundaries in this study. **e.** Overlap of boundaries based on Hi-C DpnII experiments. The bars show the overlap between the indicated sets below (black dots). Two boundaries were considered overlapping if they were within 2000 bp from each other. The intersections were plotted using UpSetR <sup>1</sup>. **f.** Comparison of unique boundaries in our study with the unique boundaries in previous studies <sup>2,3</sup> with respect to CP190. Our unique boundaries overlap more frequently with CP190. **g.** Similar to f, but comparing TAD separation score. **h.** Histograms of the distance of our boundaries and other published boundary sets to CP190 peaks. The ‘random’ dataset contains our boundary set randomly shuffled (see methods). **i.** As in Fig. 1h, modENCODE histone marks at non-promoter and promoter boundaries. In all cases the promoter boundaries are associated significantly to the active marks (H3K36me3 and H4K16ac,  $p$ -value  $\leq 3.106261e-17$  Wilcoxon rank-sum test).

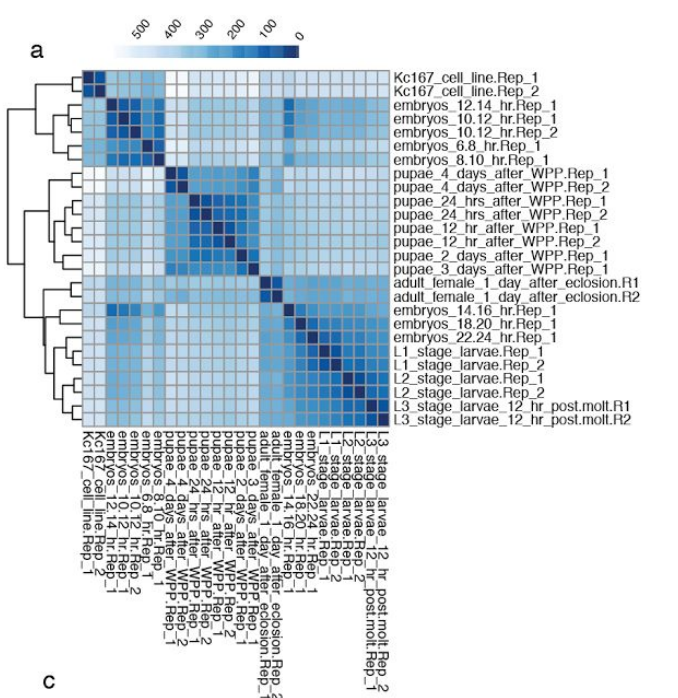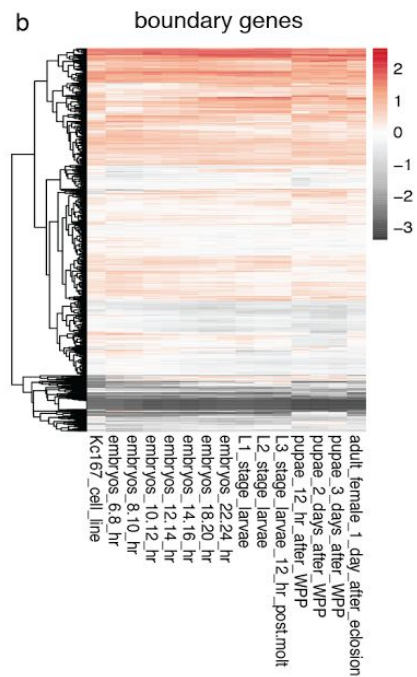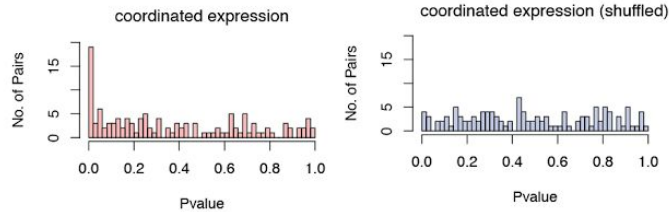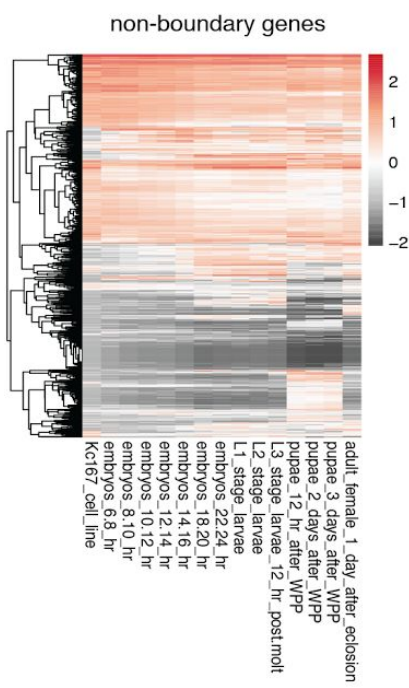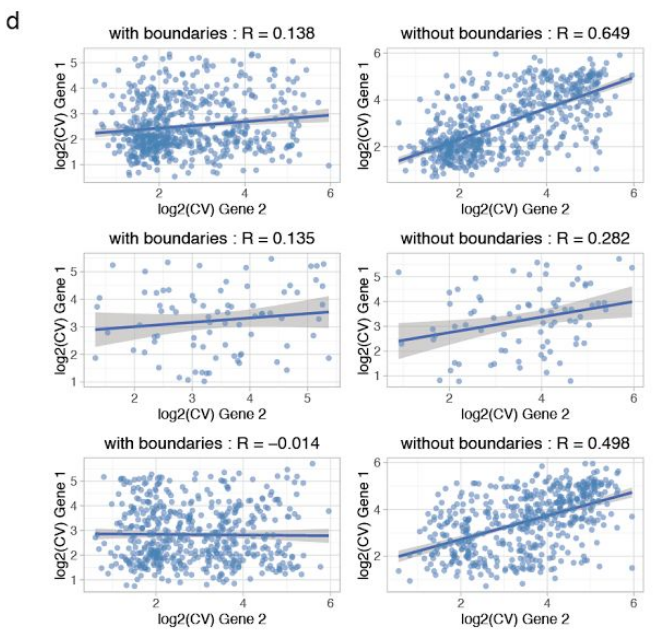

**Supplementary Figure 2. Gene expression is coordinated inside TADs.** **a.** Euclidean distances between RNA-Seq samples from modENCODE used in this study. Replicates were later merged (mean) for the analysis. **b.** Clustering of genes by expression in Kc167 cells and at different developmental stages. Genes lying on either side of TAD boundaries tend to show consistent expression (top), while genes within TADs show variable expression (bottom) during development (color bar : row-wise z-score). Genes without boundaries were sampled randomly to the same number as genes with boundaries. **c.** P-values from ANOVA between genes within pairs of adjacent TADs (see methods). Expression within TADs is more coordinated (left) compared to genes randomly assigned to TADs (right). **d.** Same as Fig. 2d, here the adjacent gene-pairs are separated by their relative orientation: divergent (top), convergent (middle), and tandem (below) pairs. Gene-pairs without boundaries were sampled randomly to the same number as genes with boundaries. Line shows the linear model fit (shaded region: std. error).

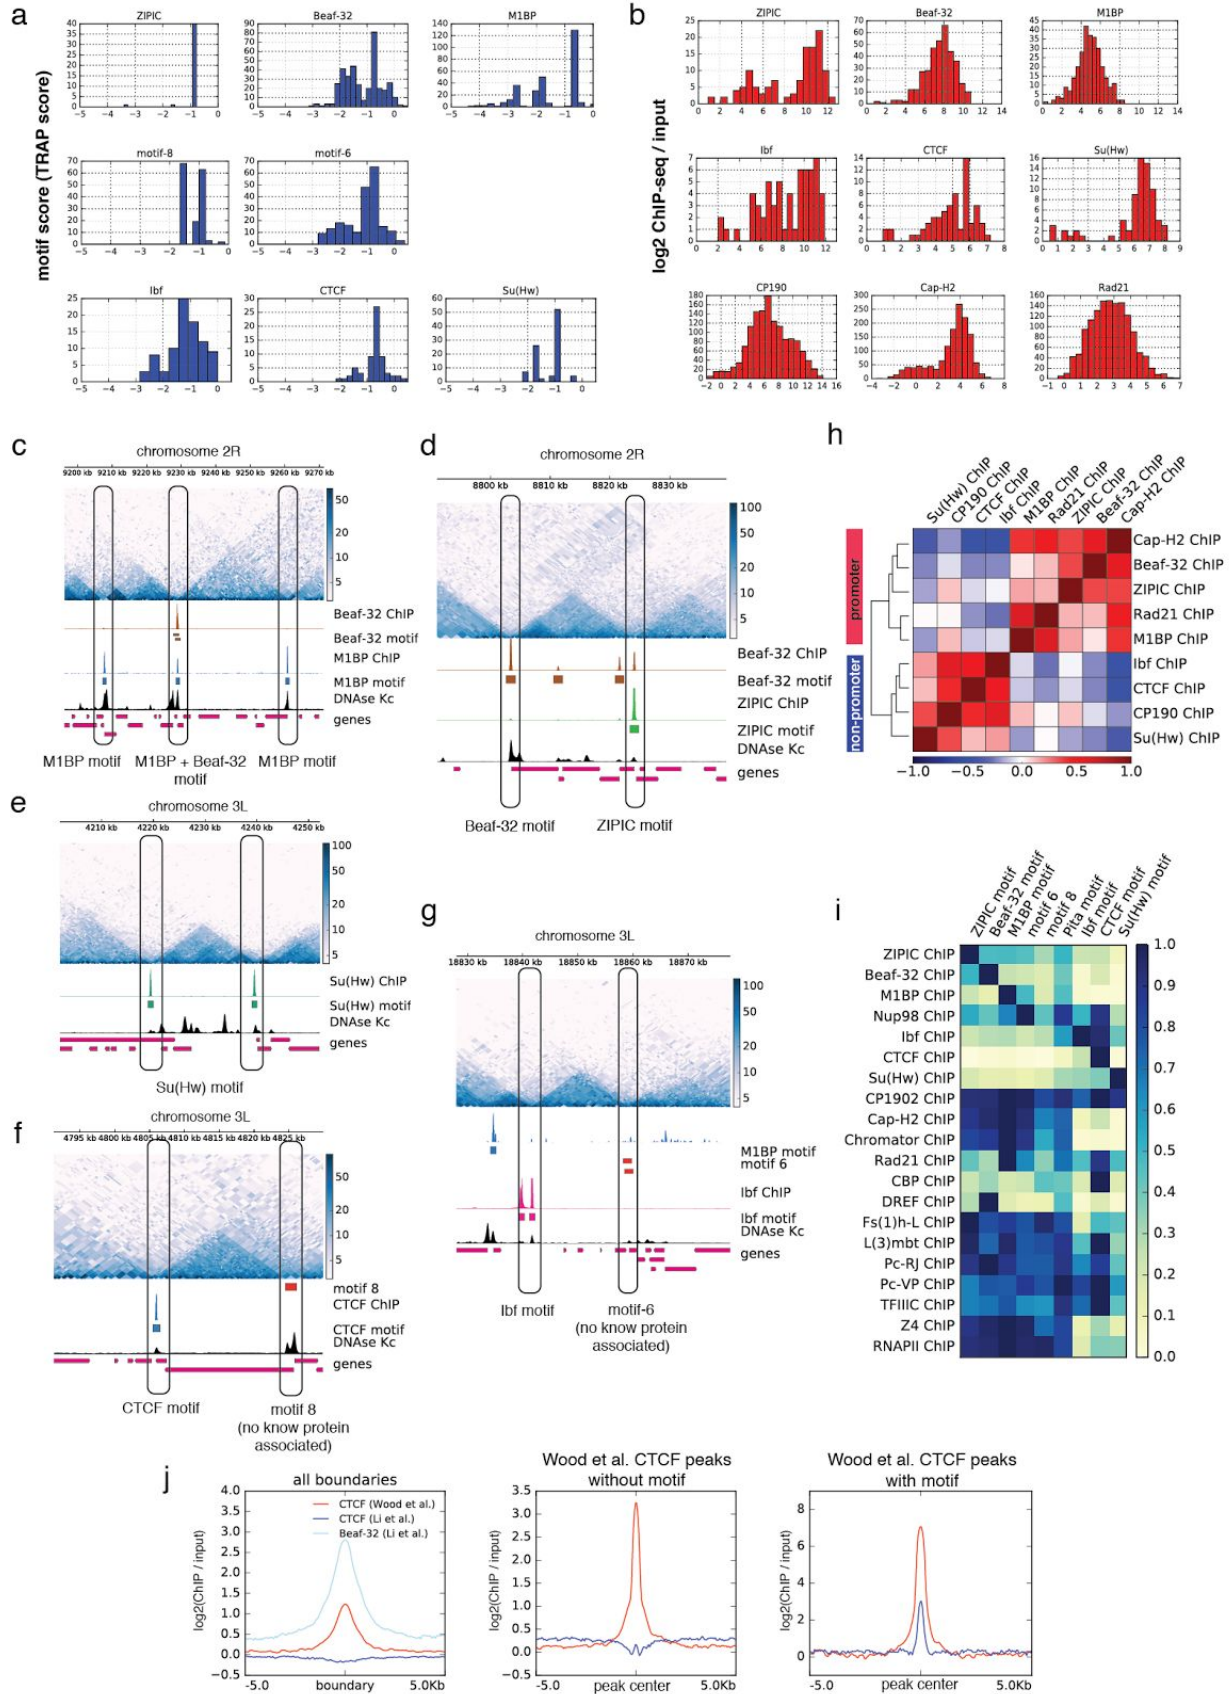

**Supplementary Figure 3. Boundary motifs and their relationship to the ChIP-Seq profiles.**

**a.** TRAP scores for each of the TAD boundary motifs within their cluster. **b.** ChIP-seq log<sub>2</sub> ratio (ChIP/input) for the insulator proteins within their cluster. In the case of CP190, Cap-H2 and Rad21 the histogram contains the values over all boundaries. **c-g.** Examples of distinct insulators at boundaries. As in Fig. 1a, the top track shows Hi-C corrected counts. **h.** Heatmap showing Pearson correlations of ChIP-seq log<sub>2</sub> ratios (IP / input) measured at TAD boundaries. The *complete* linkage method (also known as furthest neighbour clustering) was used for the hierarchical clustering. **i.** As in Fig. 3d. Each cell in the matrix contains the mean fold change of all respective ChIP-seq peaks having the motif. For each row, the maximum fold change was scaled to 1. **j.** Comparison of CTCF ChIP-seq experiments from Wood et. al.<sup>4</sup> and Li et. al.<sup>5</sup>. The first panel contains the mean values over all boundaries, the middle panel contains mean values for all CTCF peaks from Wood et. al.<sup>4</sup> that do not have the CTCF motif, and the last panel contains CTCF peaks from Wood et. al.<sup>4</sup> that have the CTCF motif. The CTCF ChIP-seq from Li et. al.<sup>5</sup> only shows enrichment when the CTCF motif is present while the CTCF ChIP-seq from Wood et al.<sup>6</sup> has unspecific bindings.

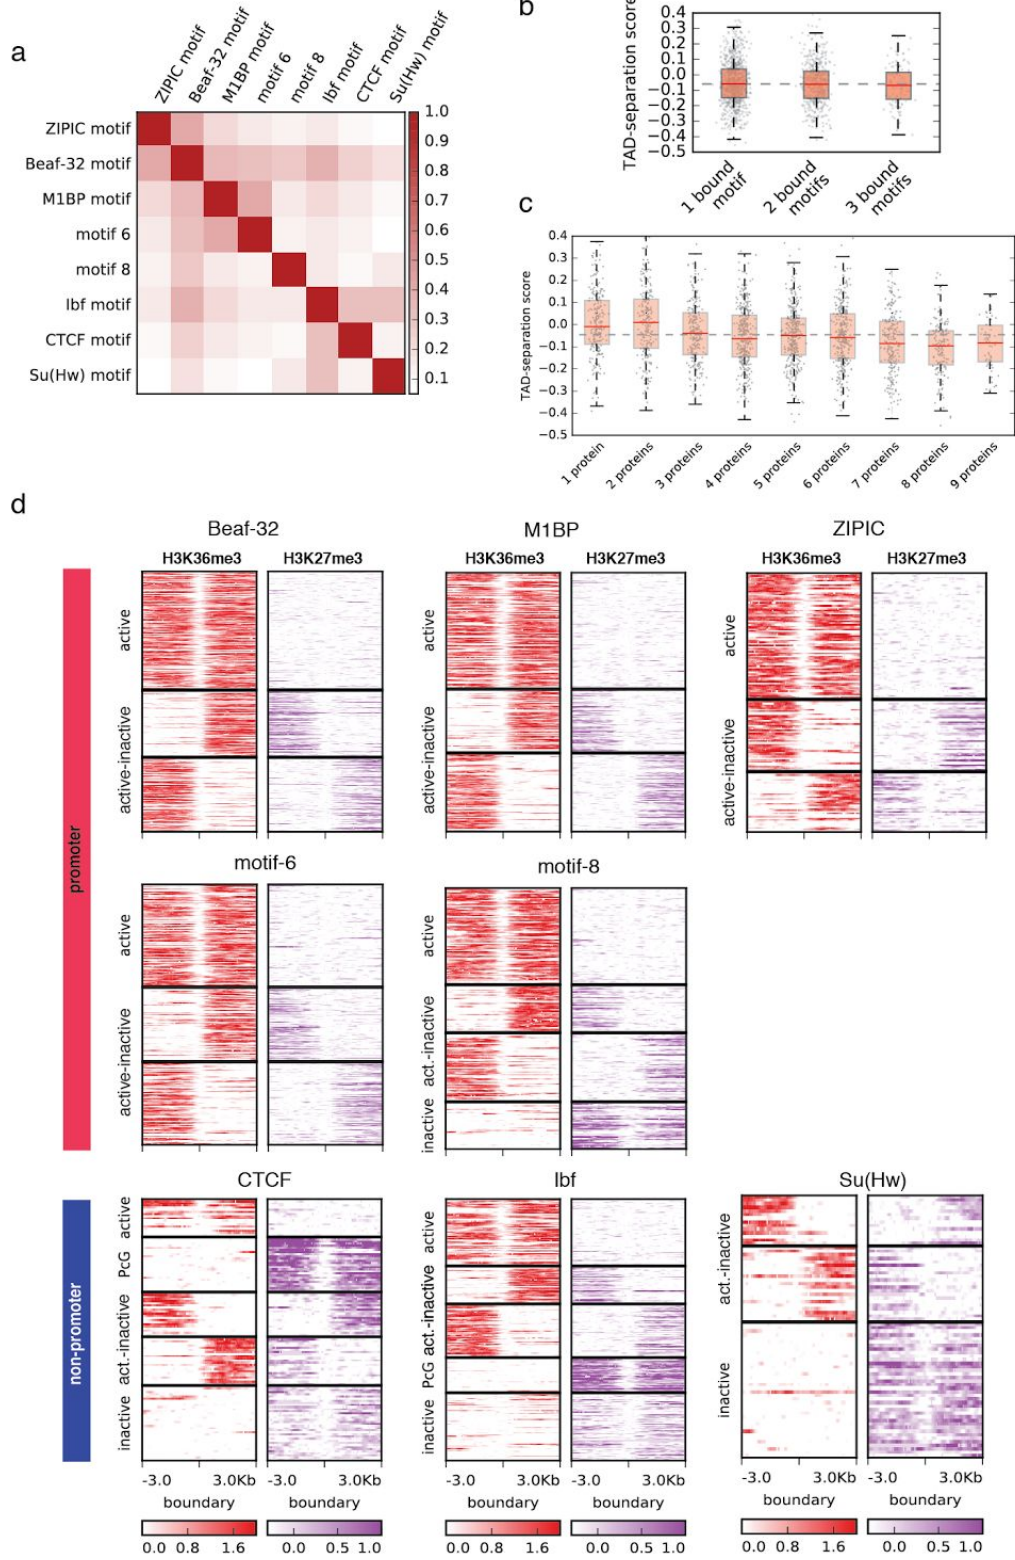

**Supplementary Figure 4. Effect of motif combinations on boundary strength and chromatin marks.** **a.** Heatmap of the overlap coefficient between boundary motifs. For each pair of motifs, the overlap coefficient is defined as  $\text{Overlap-coefficient}(A, B) = A \cap B / \min(|A|, |B|)$  where A, B are the sets of all boundaries containing either motif A or B. **b.** TAD separation at boundaries containing one, two or three insulator motifs. Virtually no difference in boundary strength is observed with the number of insulator motifs present at boundaries. **c.** TAD separation score at boundaries bound by 1 up to 10 proteins known to be associated with boundaries (discarding information about motif enrichment). If we do not consider motif information, some variation can be seen in boundary strength associated to the number of bound proteins, especially between 2 to 3 boundary proteins and between 6 and 7 proteins ( $p$ -value  $\leq 0.01$  Wilcoxon rank sum test). **d.** Normalized  $\log_2$  ChIP/input at transitions from different histone marks at boundaries for the active chromatin H3K36me3 and the repressive chromatin mark H3K27me3 on a 6 kb region centered at the boundaries. We performed  $k$ -means clustering using deepTools<sup>6</sup>. For CTCF and Ibf five clusters were used to distinguish boundaries between Polycomb group TADs. The low histone mark values at the boundaries (white color running at the center of the heatmaps) are indicative of nucleosome free regions. The polycomb group repressed chromatin (PcG) is characterized by higher intensities of H3K27me3 compared to the inactive chromatin.



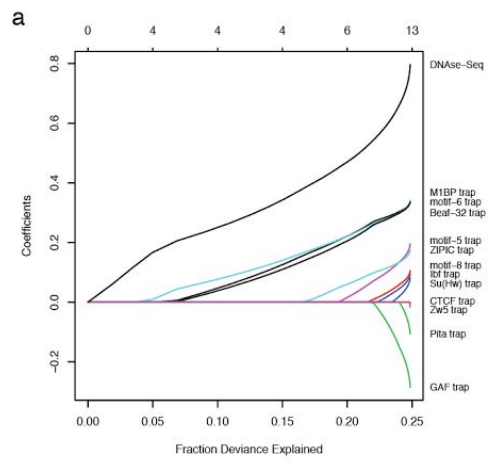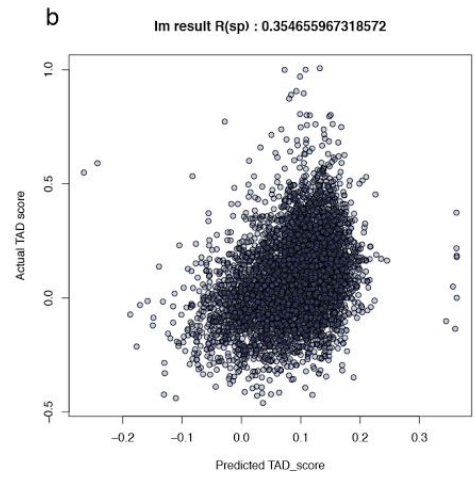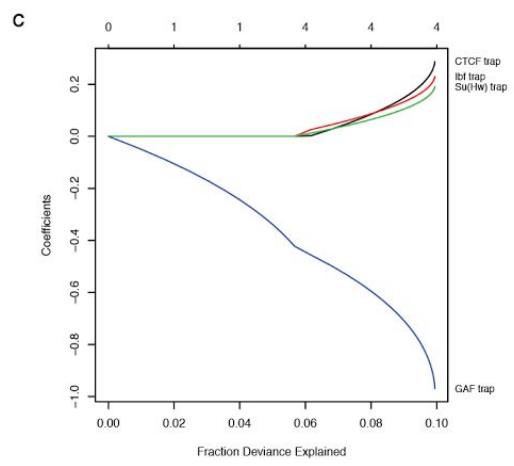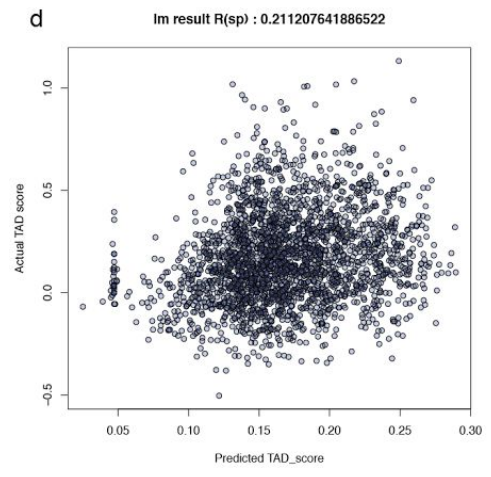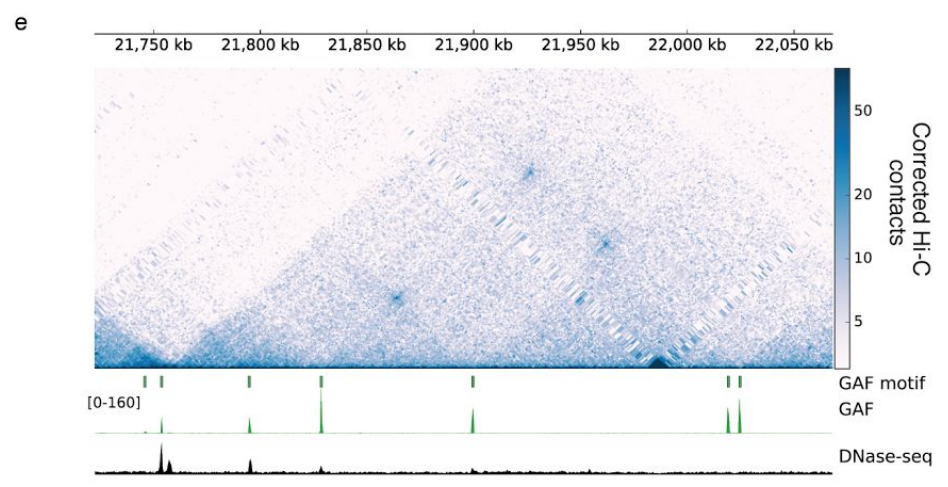

**Supplementary Figure 5. Results from lasso and linear model predictions.** **a.** Lasso penalized coefficients for promoters. Open chromatin (DNase-seq), followed by Beaf-32, M1BP and motif-6 are the three top predictors to classify promoters as TAD boundaries, while GAF and Pita are negatively associated. **b.** At promoters: TAD score predictions using linear model on an independent test dataset. The predicted scores correlate with the actual TAD-separation scores on promoters. **c.** Lasso penalized coefficients for non-promoter open sites. TRAP score signal for CTCF, Ibf1 and Su(Hw) are positively correlated with boundaries, while GAF shows negative correlation. **d.** At non-promoter open sites : predicted TAD scores from linear model on an independent test dataset. **e.** GAF motif, which is negatively associated with promoter and non-promoter boundaries, can be found alone along with the protein at loop domains.

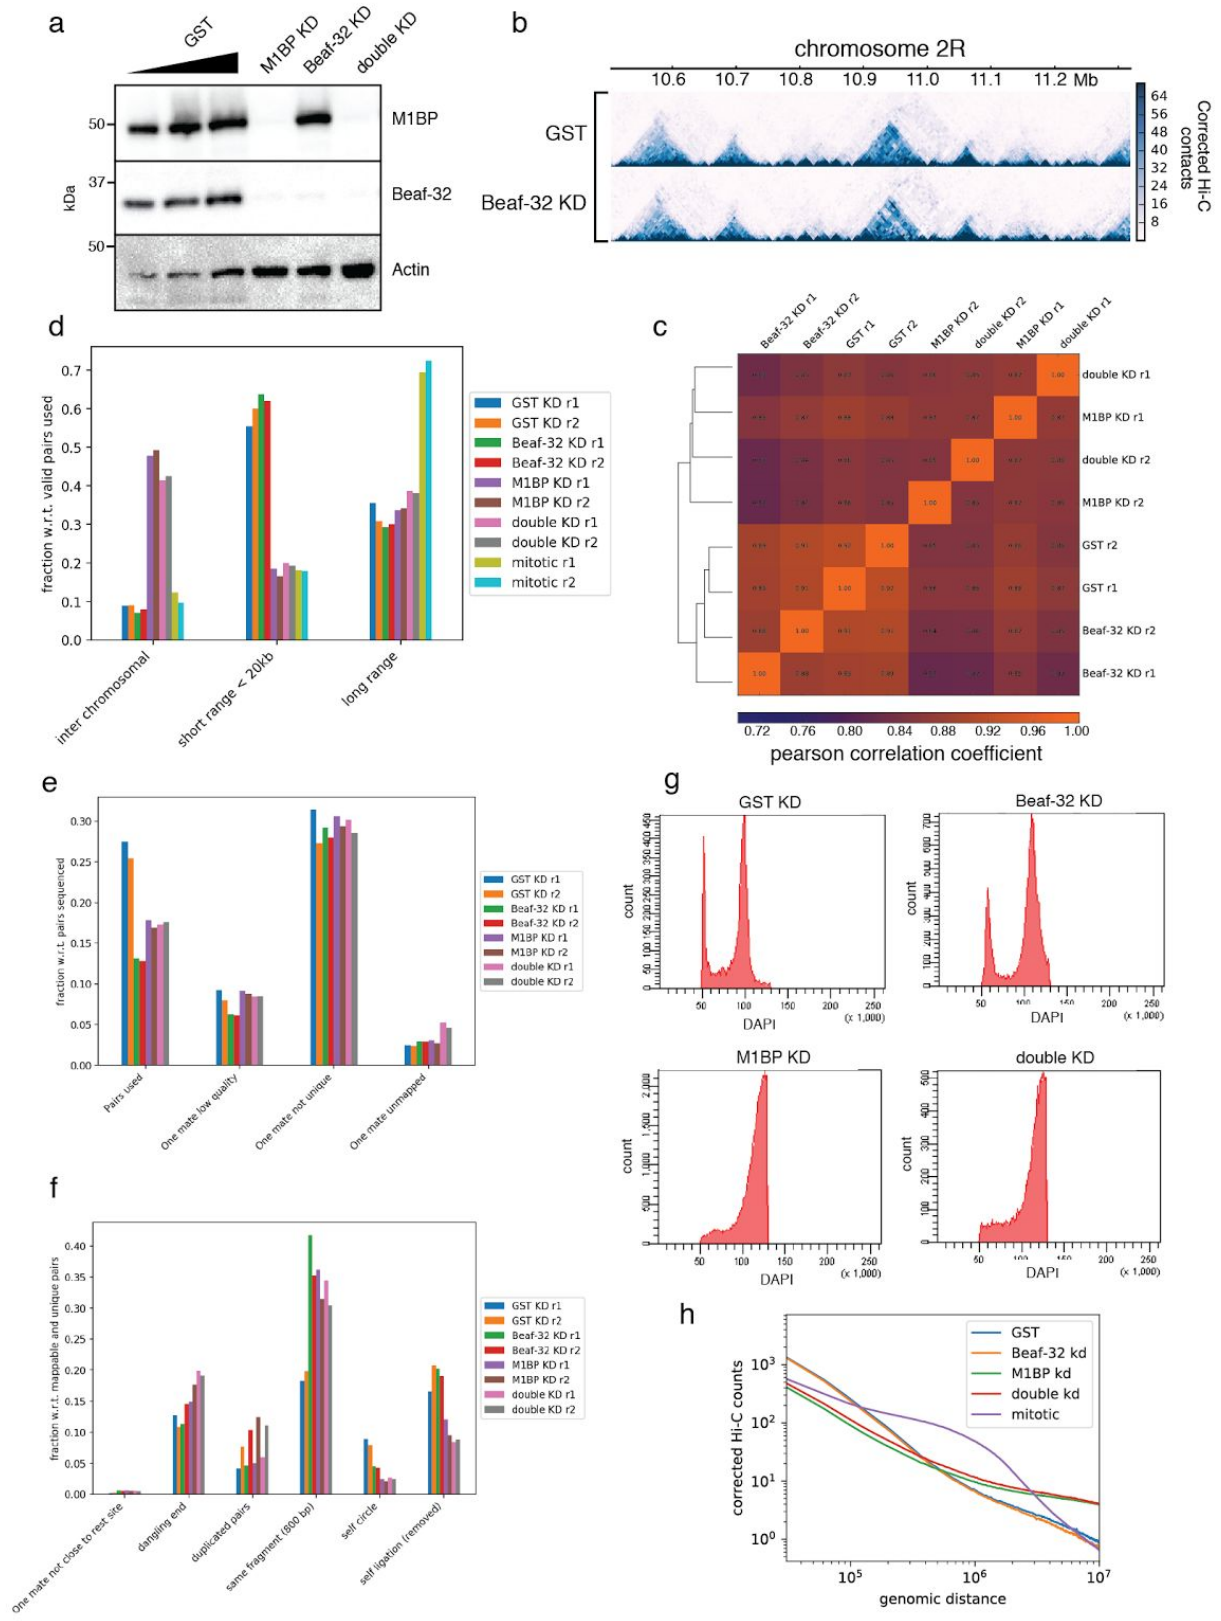

**Supplementary Figure 6. Beaf-32 and M1BP knockdowns Hi-C.** **a.** Western blots showing protein levels of M1BP and Beaf-32 (compared to GST control) after RNAi treatment in S2 cells. **b.** Example region showing contacts for all GST and Beaf-32 KD. All matrices were normalized to match the total number of contacts of the smaller matrix. The bin size used was 3kb. **c.** Pearson correlation of corrected Hi-C matrices. The correlation was done between Hi-C bins within 50 kbp. **d.** Fraction of Hi-C pairs classified as inter-chromosomal by *cis* distancer. Mitotic data values were added for comparison from Hug et al.<sup>7</sup> The total number of reads sequenced are listed in Supplementary Table 5. **e.** Fraction of valid Hi-C pairs used compared to low quality, unmapped and non-unique. **f.** Fraction of Hi-C pairs that are filtered by various reasons. These plots is part of the QC module of HiCExplorer. **g.** FACS analysis using DAPI for GST, Beaf-32, M1BP and M1BP + Beaf-32 knockdowns. M1BP knockdown affects cell growth and causes an arrest in cell-cycle not seen in GST or Beaf-32 KD. **h.** Genomic distance vs. Hi-C counts. Larger matrices were scaled down to match the sum of the smallest matrix. Only replicate 1 of all experiments was used. The ‘mitotic’ data is based on the Hi-C data on mitotic fly cells from Hug et. al. <sup>7</sup>.

a

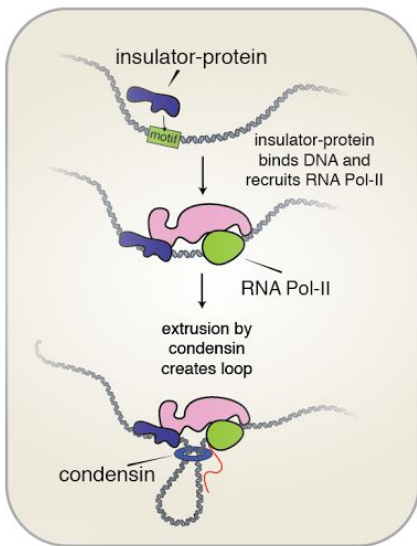

b

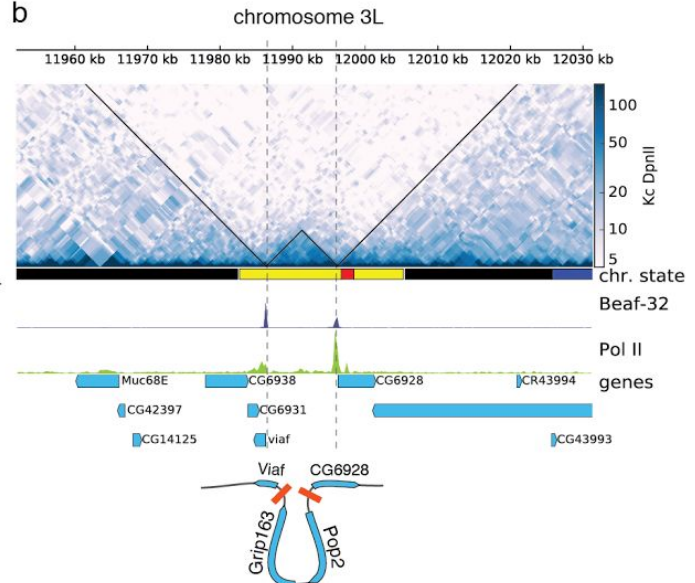

c

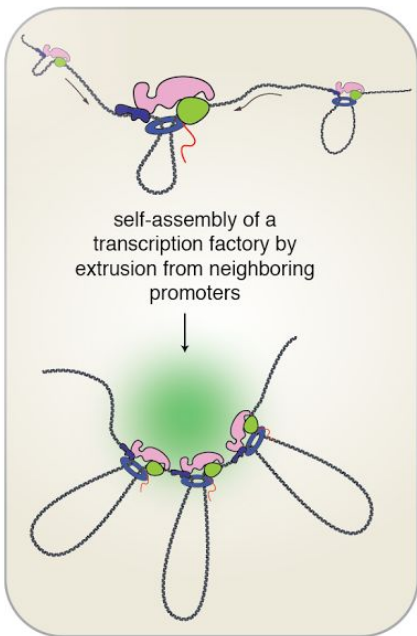

d

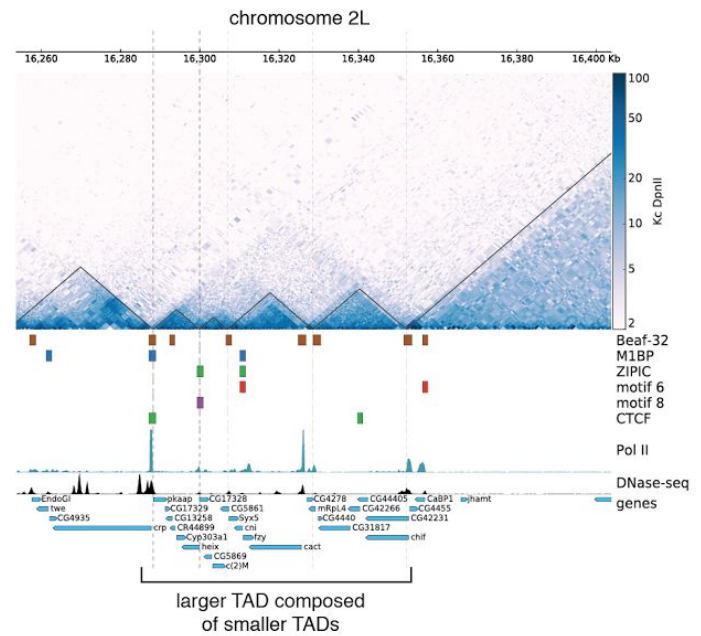

e

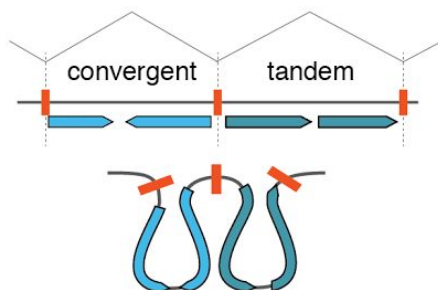

**Supplementary Figure 7. Model for the formation of TADs.** **a.** Top: Binding of an insulator protein to its cognate motif at a core promoter facilitates RNA Pol-II initiation which in turn recruits condensin complex which initiates extrusion<sup>8</sup>. **b.** As shown by simulations<sup>9,10</sup> TADs in Hi-C contact maps are consistent with loop extrusion. Here we show a small active region between two large inactive TADs. The active region contains two genes and is flanked by the Beaf-32 insulator. The expected loop from this region is shown below. **c.** Neighboring promoters, each extruding a loop, end up meeting each other to form a rosette reminiscent of proposed transcription factories<sup>11,12</sup>. Such clusters, are also observed in a recent single-nucleus HiC study<sup>13</sup>. **d.** The TADs demarcated by the insulators motif and RNA Pol-II form a larger TAD. This implies that the smaller TADs remain in closer contact to each other compared to the surrounding inactive chromatin. This hierarchical TAD structure resembles the proposed structure of transcription factories. **e.** Insulators at divergent gene promoters serve as good anchors, by recruiting two Pol-II/Condensin machines in both directions. Red bars represent insulator motifs at promoters and dotted lines show the location of boundaries. The expected loops from this region are shown below.

**Supplementary Table 1. Enriched motifs found at ChIP-seq peaks.**

| MOTIF Protein       | Beaf-32              | M1BP                      | Pita                      | CTCF                      | Ibf1/2              | ZIPIC                     | Zw5                | Su(Hw)               | GAF                 | CP190              | Mod (mdg4)         | Cap-H2               | Chromator            | Rad21              |
|---------------------|----------------------|---------------------------|---------------------------|---------------------------|---------------------|---------------------------|--------------------|----------------------|---------------------|--------------------|--------------------|----------------------|----------------------|--------------------|
| Beaf-32 motif       | 285(600)<br>3.3e-230 | 95(600)<br>4.2e-18        | 85(600)<br>1.2e-014       |                           |                     | 119(600)<br>)<br>5.2e-72  |                    |                      |                     | 51(300)<br>2.8e-5  |                    | 219(600)<br>3.0e-187 | 102(300)<br>5.5e-52  | 28(300)<br>9.9e-8  |
| M1BP motif          | 30(600)<br>9.5e-7    | 519(600)<br>6.0e-101<br>2 | 73(600)<br>8.4e-054       |                           |                     | 47(600)<br>2.3e-6         | 28(300)<br>2.1e-10 |                      |                     | 88(300)<br>3.3e-42 |                    | 102(600)<br>3.4e-98  | 88(300)<br>1.2e-074  | 84(300)<br>4.2e-97 |
| Pita motif          |                      |                           | 114(600)<br>)<br>1.1e-093 |                           | 56(300)<br>3.8e-21  |                           |                    |                      |                     |                    |                    |                      |                      |                    |
| CTCF motif          | 24(600)<br>1.1e+3    |                           | 74(600)<br>1.1e-53        | 272(600)<br>)<br>5.0e-562 | 75(300)<br>9.3e-92  | 73(600)<br>1.2e-22        |                    |                      |                     | 32(300)<br>1.0e-20 | 42(300)<br>9.4e-44 |                      |                      |                    |
| Ibf1/2 motif        |                      |                           |                           | 3.5e-008<br>(dreame)      | 195(300)<br>2.6e-49 |                           |                    |                      |                     | 2.5e-9<br>(dreame) |                    |                      |                      |                    |
| ZIPIC motif         | 168(600)<br>7.6e-55  | 19(600)<br>1.4            | 108(600)<br>)<br>3.3e-108 |                           |                     | 356(600)<br>)<br>6.1e-256 |                    |                      |                     | 28(300)<br>3.6e-4  |                    | 120(600)<br>1.2e-61  |                      |                    |
| Zw5 motif           |                      |                           |                           |                           |                     |                           | 87(300)<br>3.1e-98 |                      |                     |                    |                    |                      |                      |                    |
| Su(Hw) motif        |                      |                           |                           |                           |                     |                           |                    | 175(300)<br>3.8e-208 |                     | 66(300)<br>7.1e-60 | 27(300)<br>9.4e-13 |                      | 24(300)<br>5.4e-9    |                    |
| GAF motif           |                      |                           |                           |                           |                     |                           |                    |                      | 67(300)<br>1.8e-152 |                    | 27(300)<br>9.4e-13 |                      |                      |                    |
| Ohler motif 5 motif | 40(600)<br>3.5e+6    | 27(600)<br>5.5e-1         | 48(600)<br>1.8e-21        |                           |                     | 71(600)<br>2.7e-23        | 27(300)<br>8.9e-12 |                      |                     | 26(300)<br>5.3e-6  |                    |                      |                      |                    |
| Ohler motif 6 motif |                      | 138(600)<br>9.6e-94       |                           |                           |                     | 40(600)<br>3.0e-11        |                    |                      |                     | 67(300)<br>4.0e-10 |                    | 67(600)<br>4.8e-14   |                      |                    |
| Ohler motif 8 motif | 30(600)<br>9.5e-7    | 12(600)<br>6.1e+8         |                           |                           | 54(300)<br>1.0e-7   | 30(600)<br>4.7e+3         |                    |                      |                     | 49(300)<br>1.6e-2  | 42(300)<br>3.4e-9  | 18(600)<br>2.4e-12   |                      | 98(300)<br>3.0e-7  |
| A-rich repeat       |                      |                           |                           |                           |                     |                           |                    |                      | 128(300)<br>6.4e-15 |                    |                    |                      | 118(300)<br>2.8e-105 |                    |
| (CA)n repeat        |                      |                           |                           |                           |                     | 40(600)<br>1.0e-11        |                    | 43(300)<br>1.7e-42   | 77(300)<br>2.5e-276 |                    |                    |                      |                      | 35(300)<br>2.0e-22 |

The table shows number of sites with motifs (total number of sites) and MEME<sup>14</sup> E-value. In some cases the DREME<sup>15</sup> E-value is shown.

**Supplementary Table 2. Comparison of motif enrichment using different sets of boundaries.**

| MOTIF                       | DE-NOVO    |             |                         |                          | Meme<br>Non<br>promoters | Dreme<br>Non<br>promoters | KNOWN      |             |                         |                          |          |
|-----------------------------|------------|-------------|-------------------------|--------------------------|--------------------------|---------------------------|------------|-------------|-------------------------|--------------------------|----------|
|                             | AME<br>all | TRAP<br>all | AME<br>Non<br>promoters | TRAP<br>Non<br>promoters |                          |                           | AME<br>all | TRAP<br>all | AME<br>Non<br>promoters | TRAP<br>Non<br>promoters |          |
| <b>Sexton et al.</b>        |            |             |                         |                          |                          |                           |            |             |                         |                          |          |
| <b>M1BP</b>                 | 6.36E-29   | 1.49E-22    |                         |                          |                          |                           |            | 9.11E-36    | 2.67E-27                |                          |          |
| <b>Beaf-32</b>              | 1.72E-21   | 1.87E-23    |                         |                          |                          |                           |            | 6.02E-22    | 4.07E-22                |                          |          |
| <b>Motif-6</b>              | 1.39E-11   | 5.73E-17    |                         |                          |                          |                           |            | 6.50E-16    | 9.86E-18                |                          |          |
| <b>ZIPIC</b>                | NA         | NA          |                         |                          |                          |                           |            | 6.71E-15    | 1.87E-10                |                          |          |
| <b>Motif-8</b>              | NA         | NA          |                         |                          |                          |                           |            | 3.34E-04    | 2.9E-5                  |                          |          |
| <b>CTCF</b>                 | NA         | NA          | NA                      |                          | 4.00E+10                 |                           |            | NA          | 0.96                    | 5.04E-09                 | 1.4E-4   |
| <b>Su(Hw)</b>               | NA         | NA          | 2.91E-01                | 0.0313                   | 6.20E+14                 |                           |            | NA          | 0.082                   | 2.49E-02                 | 0.0381   |
| <b>lbf1/2</b>               | NA         | NA          | NA                      |                          |                          |                           |            | 2.22E-04    | 1.3E-3                  | NA                       | 6.6E-4   |
| <b>Cubeñas-Potts et al.</b> |            |             |                         |                          |                          |                           |            |             |                         |                          |          |
| <b>M1BP</b>                 | 1.17E-50   | 5.90E-34    |                         |                          |                          |                           |            | 8.65E-53    | 6.38E-40                |                          |          |
| <b>Beaf-32</b>              | 1.25E-52   | 1.04E-50    |                         |                          |                          |                           |            | 1.45E-46    | 1.16E-48                |                          |          |
| <b>Motif-6</b>              | 9.64E-38   | 1.52E-45    |                         |                          |                          |                           |            | 2.23E-38    | 3.91E-43                |                          |          |
| <b>ZIPIC</b>                | NA         | NA          |                         |                          |                          |                           |            | 8.10E-27    | 1.07E-19                |                          |          |
| <b>Motif-8</b>              | NA         | NA          |                         |                          |                          |                           |            | 1.47E-10    | 9.12E-11                |                          |          |
| <b>CTCF</b>                 | NA         | NA          | 8.10E-11                | 0.00129                  | 9.17E-06                 |                           |            | NA          | 0.117                   | 7.53E-06                 | 0.0633   |
| <b>Su(Hw)</b>               | NA         | NA          | NA                      | 6.79E-06                 |                          |                           |            | 3.69E-02    | 3.5E-4                  | 1.52E-06                 | 0.03481  |
| <b>lbf1/2</b>               | NA         | NA          | NA                      |                          |                          |                           |            | 1.08E-11    | 2.75E-09                | 9.03E-02                 | 6.53E-05 |
| <b>This study</b>           |            |             |                         |                          |                          |                           |            |             |                         |                          |          |
| <b>M1BP</b>                 | 4.24E-72   | 9.96E-72    |                         |                          |                          |                           |            | 7.84E-85    | 5.20E-87                |                          |          |
| <b>Beaf-32</b>              | 2.10E-64   | 1.27E-74    |                         |                          |                          |                           |            | 1.63E-64    | 3.27E-70                |                          |          |
| <b>Motif-6</b>              | 4.83E-45   | 5.26E-64    |                         |                          |                          |                           |            | 1.47E-48    | 8.65E-66                |                          |          |
| <b>ZIPIC</b>                | NA         | NA          |                         |                          |                          |                           |            | 5.09E-37    | 1.07E-30                |                          |          |
| <b>Motif-8</b>              | 1.58E-04   | 0.721       |                         |                          |                          |                           |            | 8.86E-08    | 7.27E-16                |                          |          |
| <b>CTCF</b>                 | NA         | NA          | 1.83E-04                | 0.0511                   | 1.10E-02                 | 1.10E-06                  | NA         | 0.095184    | 7.53E-06                | 0.0636                   |          |
| <b>Su(Hw)</b>               | NA         | 0.0987      | 2.09E-03                | 3.89E-23                 | NA                       | 2.10E-04                  | 3.78E-03   | 4.30E-07    | 1.52E-06                | 3.87E-10                 |          |
| <b>lbf</b>                  | NA         | NA          | NA                      | 0.00137                  | NA                       |                           |            | 3.16E-07    | 6.22E-10                | 9.03E-02                 | 2.03E-05 |



**Supplementary Table 3. Hi-C data sources**

| <b>Source</b>                       | <b>Restriction enzyme</b> | <b>No. of usable reads</b> | <b>GEO accession</b>     | <b>Reference</b> |
|-------------------------------------|---------------------------|----------------------------|--------------------------|------------------|
| Whole embryos                       | DpnII                     | 133.483.965                | <a href="#">GSE34453</a> | 2                |
| Kc167                               | DpnII                     | 135.274.348                | <a href="#">GSE63515</a> | 16               |
| Kc167                               | DpnII                     | 110.807.526                | <a href="#">GSE80701</a> | 3                |
| Kc167                               | HindIII                   | 71.278.991                 | <a href="#">GSE38468</a> | 17               |
| S2                                  | HindIII                   | 680.121.887                | <a href="#">GSE58821</a> | 18               |
| Clone-8                             | HindIII                   | 131.426.003                | <a href="#">GSE58821</a> | 18               |
| third instar larvae salivary glands | HindIII                   | 9.404.794                  | <a href="#">GSE72512</a> | 19               |

**Supplementary Table 4. ChIP-seq data sources.**

| <b>Source</b>    | <b>GEO accession</b>       | <b>Reference</b> |
|------------------|----------------------------|------------------|
| Kc167 Beaf-32    | <a href="#">GSM762845</a>  | 4                |
| Kc167 CP190      | <a href="#">GSM762836</a>  | 4                |
| Kc167 CTCF       | <a href="#">GSM1535983</a> | 16               |
| Kc167 Su(Hw)     | <a href="#">GSM762839</a>  | 4                |
| Kc167 Cap-H2     | <a href="#">GSM1318356</a> | 20               |
| Kc167 Chromator  | <a href="#">GSM1318357</a> | 20               |
| Kc167 Rad21      | <a href="#">GSM1318352</a> | 20               |
| Kc167 Pita       | <a href="#">GSM2133768</a> | 3                |
| Kc167 ZIPIC      | <a href="#">GSM2133769</a> | 3                |
| Kc167 GAF        | <a href="#">GSM2133762</a> | 3                |
| Kc167 Ibf 1      | <a href="#">GSM2133766</a> | 3                |
| Kc167 Ibf 2      | <a href="#">GSM2133767</a> | 3                |
| Embryo Zw5       | <a href="#">GSM2042227</a> | 21               |
| S2 M1BP          | <a href="#">GSM1208162</a> | 22               |
| Kc167 RNA Pol-II | <a href="#">GSM1536014</a> | 16               |
| S2 DNase-seq     | <a href="#">GSM1000406</a> | 23               |

**Supplementary Table 5. Number of sequencing reads for Hi-C control and knockdowns.**

|                             | <b>GST<br/>rep. A</b> | <b>GST<br/>rep. B</b> | <b>Beaf-32<br/>KD rep. A</b> | <b>Beaf-32<br/>KD rep. B</b> | <b>M1BP KD<br/>rep. A</b> | <b>M1BP KD<br/>rep. B</b> | <b>double<br/>KD rep. A</b> | <b>double KD<br/>rep. B</b> |
|-----------------------------|-----------------------|-----------------------|------------------------------|------------------------------|---------------------------|---------------------------|-----------------------------|-----------------------------|
| <b>Pairs<br/>considered</b> | 107.8M                | 118.5M                | 102.4M                       | 151.0M                       | 298.1M                    | 213.8M                    | 217.3M                      | 180.5M                      |
| <b>Pairs used</b>           | 32.1M                 | 32.5M                 | 14,5M                        | 22.0M                        | 58.7M                     | 40.8M                     | 42.9M                       | 36.6M                       |

## References

1. Lex, A., Gehlenborg, N., Strobel, H., Vuilleumot, R. & Pfister, H. UpSet: Visualization of Intersecting Sets. *IEEE Trans. Vis. Comput. Graph.* **20**, 1983–1992 (2014).
2. Sexton, T. *et al.* Three-dimensional folding and functional organization principles of the *Drosophila* genome. *Cell* **148**, 458–472 (2012).
3. Cubeñas-Potts, C. *et al.* Different enhancer classes in *Drosophila* bind distinct architectural proteins and mediate unique chromatin interactions and 3D architecture. *Nucleic Acids Res.* **45**, 1714–1730 (2017).
4. Wood, A. M. *et al.* Regulation of Chromatin Organization and Inducible Gene Expression by a *Drosophila* Insulator. *Mol. Cell* **44**, 29–38 (2011).
5. Li, L. *et al.* Widespread rearrangement of 3D chromatin organization underlies polycomb-mediated stress-induced silencing. *Mol. Cell* **58**, 216–231 (2015).
6. Ramírez, F. *et al.* deepTools2: a next generation web server for deep-sequencing data analysis. *Nucleic Acids Res.* **44**, W160–5 (2016).
7. Hug, C. B., Grimaldi, A. G., Kruse, K. & Vaquerizas, J. M. Chromatin Architecture Emerges during Zygotic Genome Activation Independent of Transcription. *Cell* **169**, 216–228.e19 (2017).
8. Iwasaki, O. *et al.* Interaction between TBP and Condensin Drives the Organization and Faithful Segregation of Mitotic Chromosomes. *Mol. Cell* **59**, 755–767 (2015).
9. Sanborn, A. L. *et al.* Chromatin extrusion explains key features of loop and domain formation in wild-type and engineered genomes. *Proc. Natl. Acad. Sci. U. S. A.* **112**,

- E6456–65 (2015).
10. Goloborodko, A., Imakaev, M. V., Marko, J. F. & Mirny, L. Compaction and segregation of sister chromatids via active loop extrusion. *Elife* **5**, (2016).
  11. Cook, P. R. A model for all genomes: the role of transcription factories. *J. Mol. Biol.* **395**, 1–10 (2010).
  12. Sutherland, H. & Bickmore, W. A. Transcription factories: gene expression in unions? *Nat. Rev. Genet.* **10**, 457–466 (2009).
  13. Stevens, T. J. *et al.* 3D structures of individual mammalian genomes studied by single-cell Hi-C. *Nature* **544**, 59–64 (2017).
  14. Bailey, T. L. & Elkan, C. Fitting a mixture model by expectation maximization to discover motifs in biopolymers. *Proc. Int. Conf. Intell. Syst. Mol. Biol.* **2**, 28–36 (1994).
  15. Bailey, T. L. DREME: motif discovery in transcription factor ChIP-seq data. *Bioinformatics* **27**, 1653–1659 (2011).
  16. Li, L. *et al.* Widespread Rearrangement of 3D Chromatin Organization Underlies Polycomb-Mediated Stress-Induced Silencing. *Mol. Cell* **58**, 216–231 (2015).
  17. Hou, C., Li, L., Qin, Z. S. & Corces, V. G. Gene density, transcription, and insulators contribute to the partition of the *Drosophila* genome into physical domains. *Mol. Cell* **48**, 471–484 (2012).
  18. Ramírez, F. *et al.* High-Affinity Sites Form an Interaction Network to Facilitate Spreading of the MSL Complex across the X Chromosome in *Drosophila*. *Mol. Cell* **60**, 146–162 (2015).
  19. Eagen, K. P., Hartl, T. A. & Kornberg, R. D. Stable Chromosome Condensation Revealed by Chromosome Conformation Capture. *Cell* **163**, 934–946 (2015).
  20. Van Bortle, K. *et al.* Insulator function and topological domain border strength scale with architectural protein occupancy. *Genome Biol.* **15**, R82 (2014).

21. Zolotarev, N. *et al.* Architectural proteins Pita, Zw5, and ZIPIC contain homodimerization domain and support specific long-range interactions in *Drosophila*. *Nucleic Acids Res.* **44**, 7228–7241 (2016).
22. Li, J. & Gilmour, D. S. Distinct mechanisms of transcriptional pausing orchestrated by GAGA factor and M1BP, a novel transcription factor. *EMBO J.* **32**, 1829–1841 (2013).
23. Arnold, C. D. *et al.* Genome-wide quantitative enhancer activity maps identified by STARR-seq. *Science* **339**, 1074–1077 (2013).
