# Supplementary material for: High-resolution TADs reveal DNA sequences underlying genome organization in flies
Source: PubMed Central journal article supplement (PMC5768762; doi:10.1038/s41467-017-02525-w), 2018-01-15
Supplement: 41467_2017_2525_MOESM3_ESM.pdf [file 41467_2017_2525_MOESM3_ESM.pdf]

## Description of Additional Supplementary Files

### **File Name: Supplementary Data 1**

Description: High-resolution TADs. *Drosophila melanogaster* (dm3) TADs classified as Active, Inactive, PcG or HP1 in bed format.
